# Supplementary material
Source: publisher figshare collection journal article supplement (https://diabetesjournals.figshare.com/ndownloader/files/22210047)

Supplementary Figure 1: Number of Cost-Effectiveness Studies over Time, by Category


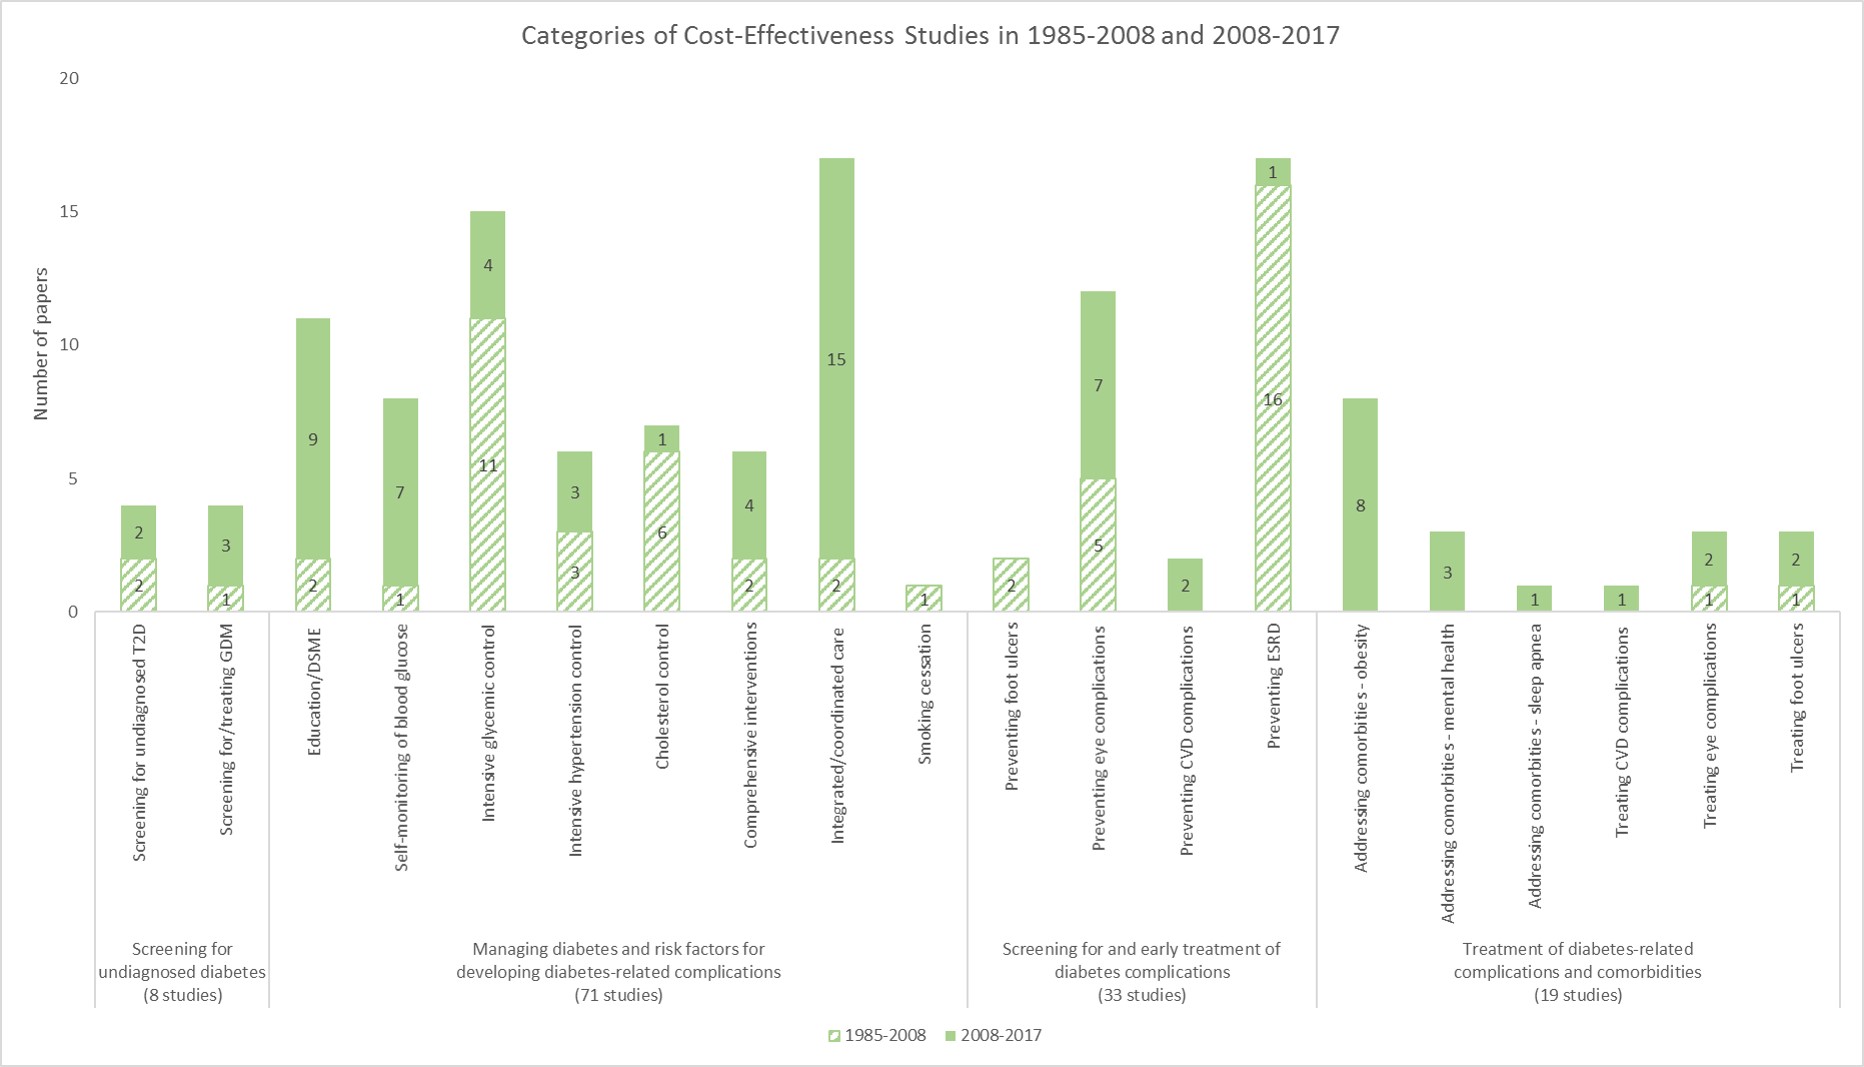

Supplement: Supplementary file 1 [file 22210047]
